# Supplementary material
Source: PubMed Central journal article supplement (PMC328455)
Supplement: gb-2003-4-10-r66-s2.pdf [file gb-2003-4-10-r66-s2.pdf]

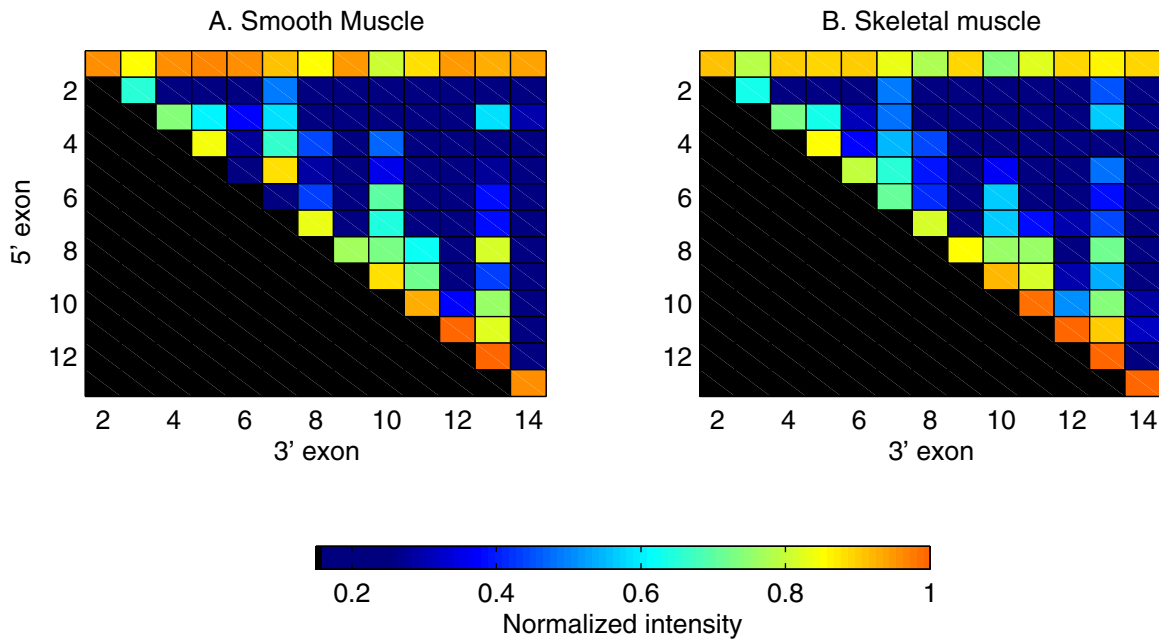

**Figure S2.** ANXA7 junction probe intensities for all possible pair-wise combinations of exons hybridized with smooth muscle (A) and skeletal muscle (B) samples. Probes are 40 nt, centrally positioned, and the hybridization used 35% formamide, as in Figure 10. Here, intensities have not been normalized by the corresponding 'edge probe' intensities. The 3' edge of exon 1 is GC rich, resulting in the high intensities of these junction probes.
