# Supplementary material
Source: PubMed Central journal article supplement (PMC328455)
Supplement: gb-2003-4-10-r66-s3.pdf [file gb-2003-4-10-r66-s3.pdf]

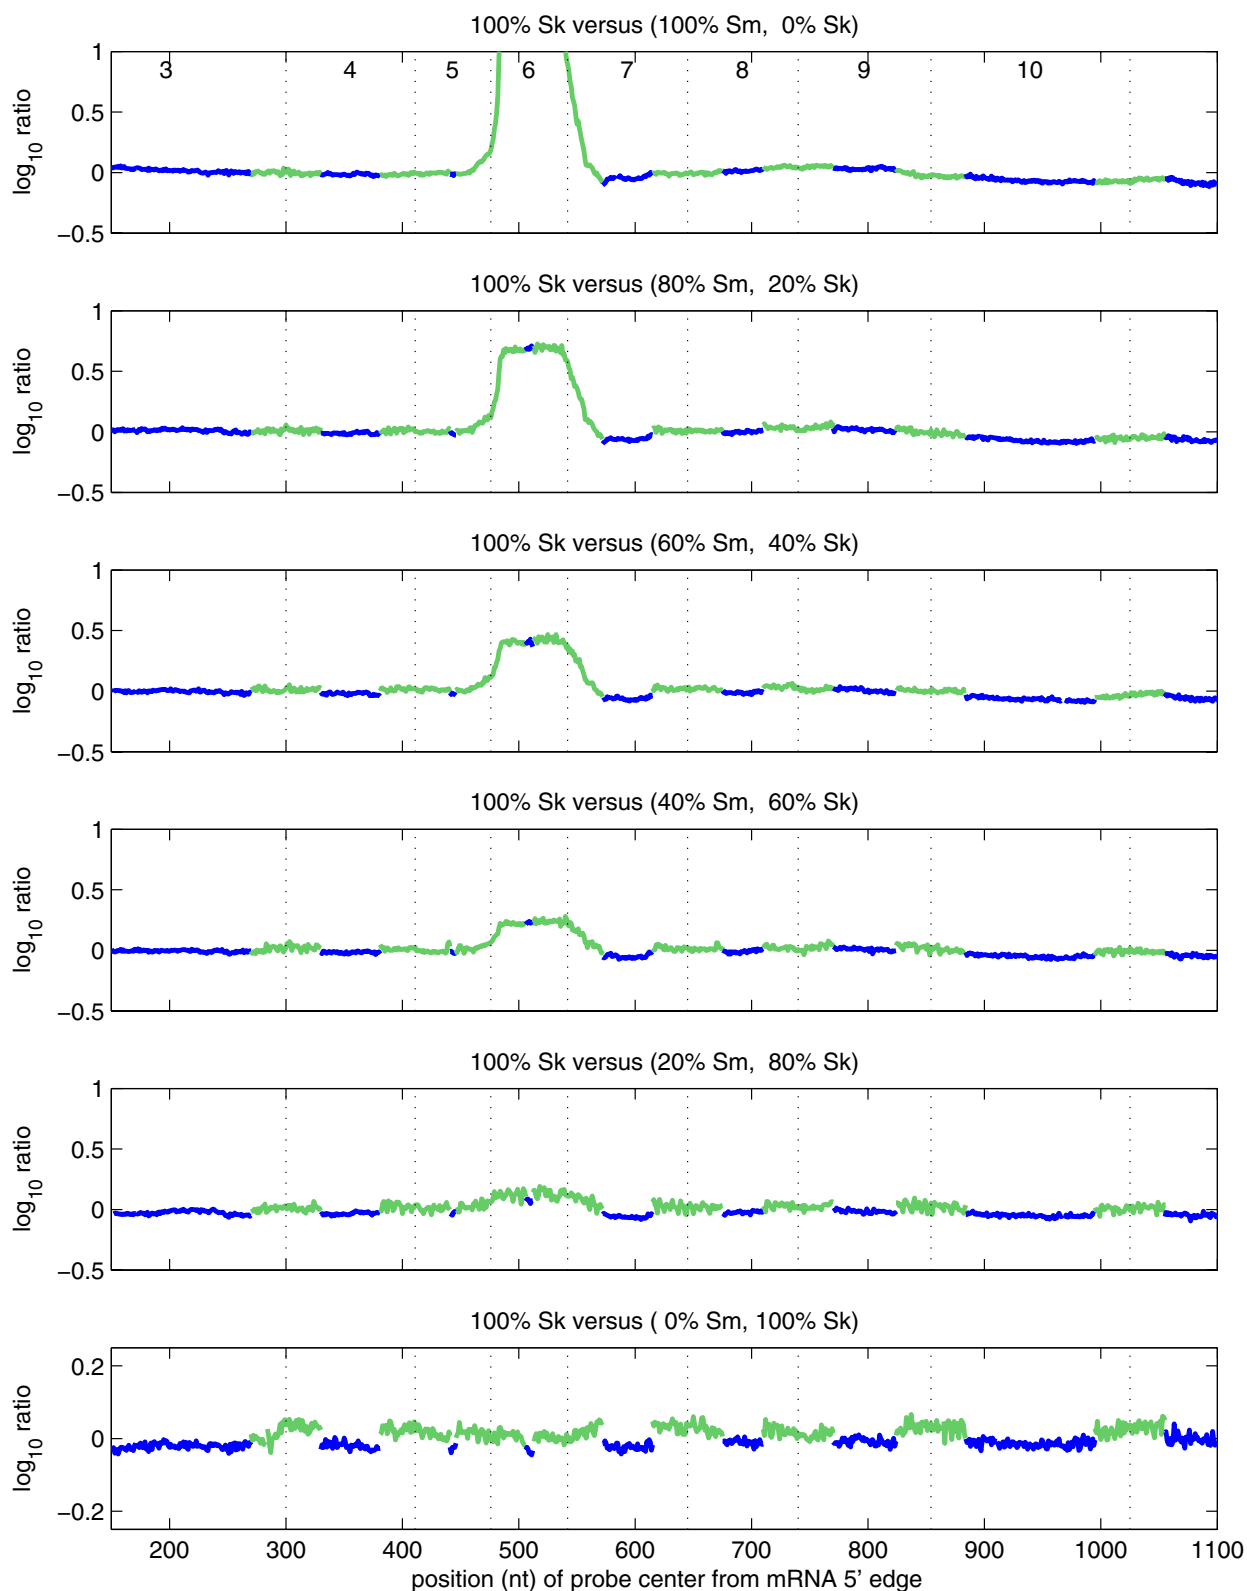

**Figure S3.** Detection of isoform mixtures in a single sample, using purified ANXA7 RT-PCR products from skeletal (sk) and smooth (sm) muscle. Probes are 60 nt in length. Both isoforms can be detected when the shorter isoform, without exon 6, makes up 20% or more of the mixture. Note that the vertical axis scale below is compressed relative to Figure 9, which highlights the 20% mixture case. Plotted are log-ratios between intensities after normalizing based on intensities of probes within unaffected exons. Blue lines are exon probes; green lines are junction probes; numbers are exon numbers. This experiment was performed for mixtures of 0, 20, 40, 60, 80, and 100% smooth muscle.
